# Supplementary material
Source: Royal Society of Chemistry journal article supplement (doi:10.1039/d6cp00724d)
Supplement: d6cp00724d1.pdf [file d6cp00724d1.pdf]

# 1 Supporting Information:

## How cysteine oxidation affects protein stability and binding studied by free energy calculations

### 1.1 Methods

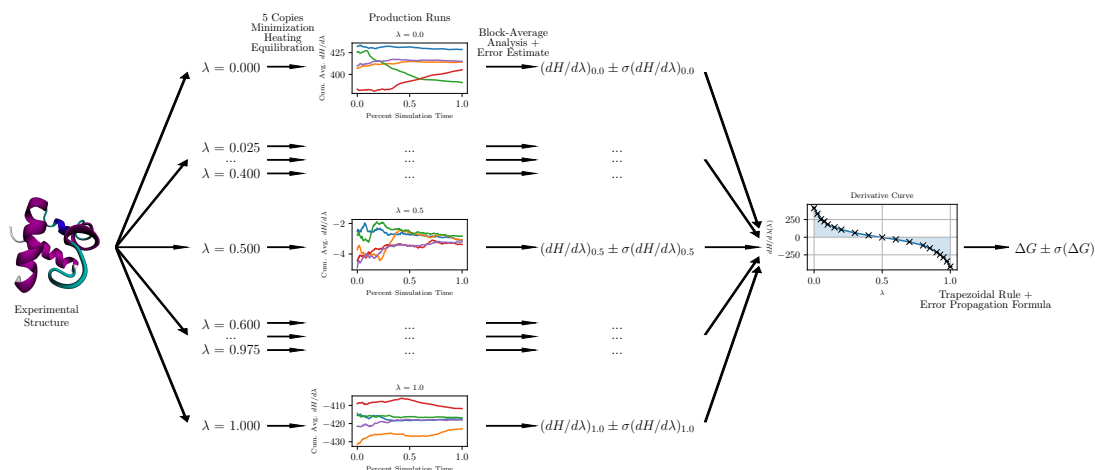

Figure S1: Schematic representation of the workflow conducted for the evaluation of the free energy difference  $\Delta G^{MUT}$  of an alchemical transformation using thermodynamic integration. It is important to note that all simulations are performed independently and multiple times allowing to extract mean free energy changes and errors of the mean.

### 1.2 Correction for deprotonation effect (DJ-1)

Due to the protein residues surrounding CYS-106 in the DJ-1 protein, its pKa is reduced to 5.4. Hence, the deprotonated form is dominating substantially over the protonated one at physiological pH [11]. In our computational model, the deprotonated form of CYS was therefore chosen as the starting configuration of the alchemical transformations to the respective oxidized forms. In consequence, the raw results of the model record the change in folding free energy due to oxidation between the an unfolded protein chain and the folded state both with a deprotonated residue at position 106. This is appropriate for the folded states due to the protein environment as discussed in the main text. In the unfolded states, this is, however, only reasonable for the oxidized states of CYS due to their low intrinsic pKa. Native CYS featuring only solvent interaction should be protonated at pH=7. In fact, free energy is needed to deprotonated the residue under these conditions. In consequence, the measured stability of the native state is overestimated as the reference state, being a protein chain with a deprotonated CYS residue, is artificially high in free energy. This leads to the following correction term, setting the correct reference state, that will also occur in experiments.

$$\begin{aligned}
 \Delta\Delta G_{Exp}^{WT \rightarrow OX} &= \Delta G_{Fold(Exp)}^{OX} - \Delta G_{Fold(Exp)}^{WT} \\
 &= \Delta G_{Fold(Model)}^{OX} - \left( \Delta G_{Fold(Model)}^{WT} + \Delta G_{Deprotonation(Unfolded)}^{WT} \right) \\
 &= \Delta\Delta G_{Model}^{WT \rightarrow OX} - \Delta G_{Deprotonation(Unfolded)}^{WT}
 \end{aligned}$$

This correction can be calculated based in ambient pH and pKa of solvent exposed cysteine.

$$\Delta G_{Deprotonation(Unfolded)}^{WT} = 2.303RT(pKa - pH) \quad (1)$$

This yields a correction of 1.77 kcal/mol.

### 1.3 URN1-FF domain protein

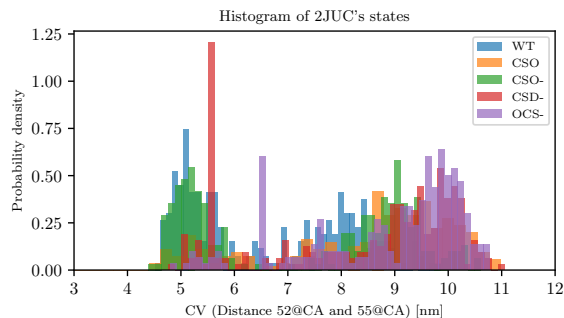

Figure S2: Histogram of CA-CA distance between TRP-52 (actual 56) and GLU-55 (actual 59) sampled from  $1 \mu\text{s}$  long simulations for all CYS oxidation states of URN1-FF. Two regimes can be distinguished in the diagram, representing the folded and partly unfolded state of the C-terminal segment of URN1-FF.

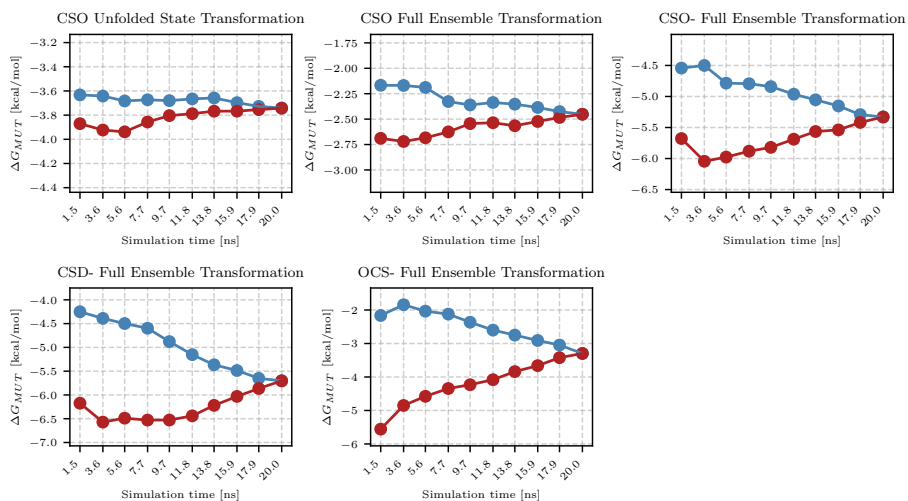

Figure S3: Convergence of the alchemical transformations studied by considering alchemical forward (blue dots) and backward (red dots) transformations for the URN1-FF system vs. simulation time per lambda window (taking consecutively more data into account) following the method by A. Mey et Al. [36]. Close final proximity of both curves indicates convergence.

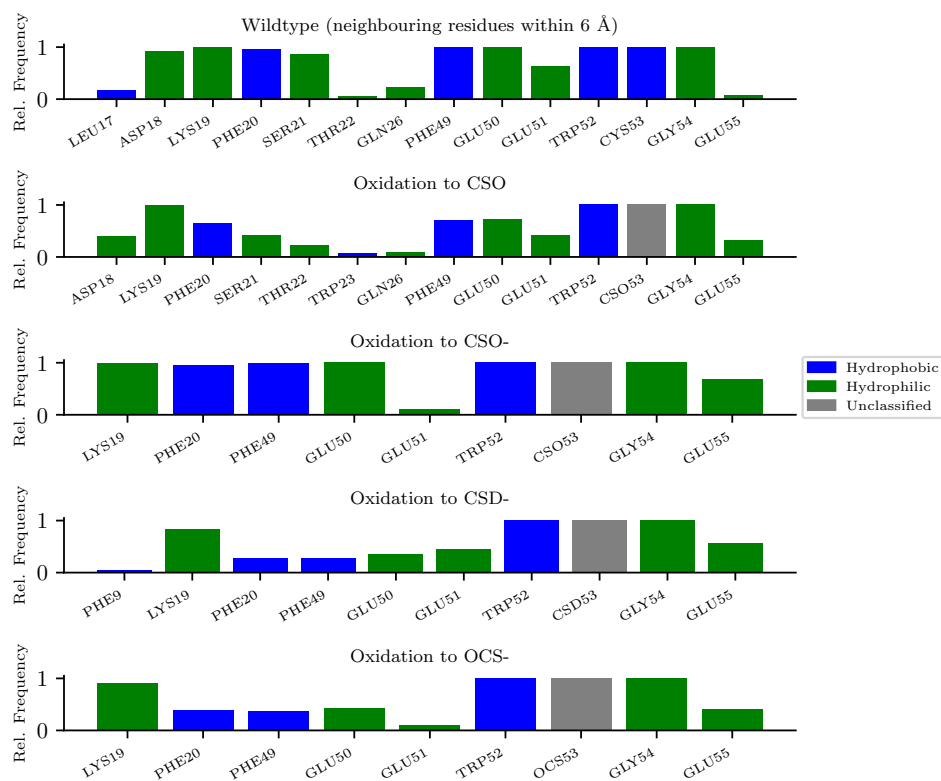

Figure S4: Neighborhood analysis of the oxidized residue. All residues within 6Å of the central sulfur atom were considered a neighboring residue. The analysis was conducted using the *pytraj* package. Color coding for hydrophobic and hydrophilic residues was added to classify the environment. Note that the numbering of the residues is shifted here by -4 relative to the original sequence. This is due to the first N-terminal 4 residues not having been resolved in the crystal structure.

### $\Delta$ RMSF analysis of URN1-FF domain upon oxidation

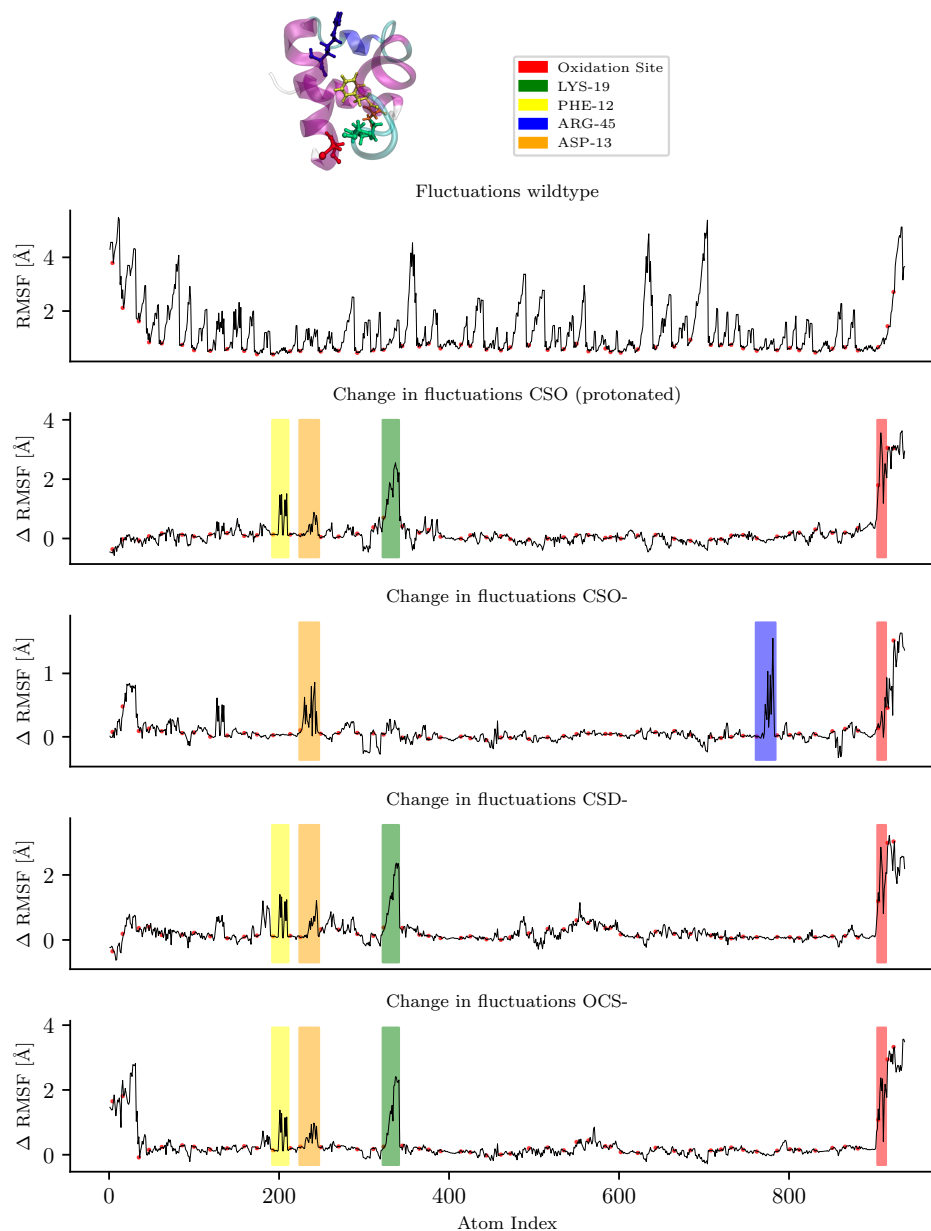

Figure S5:  $\Delta$ Root-Mean-Square-Fluctuation (RMSF) analysis of the oxidized states of the URN1-FF protein (all atom RMSF). The graphs for the oxidized states show the respective difference in the RMSF for all atoms with backbone CA atoms marked as red dots. Important residues were highlighted and can be located in the above illustration of the protein. Note that the numbering of the residues is shifted here by -4. This is due to the first four residues not having been resolved in the crystal structure.

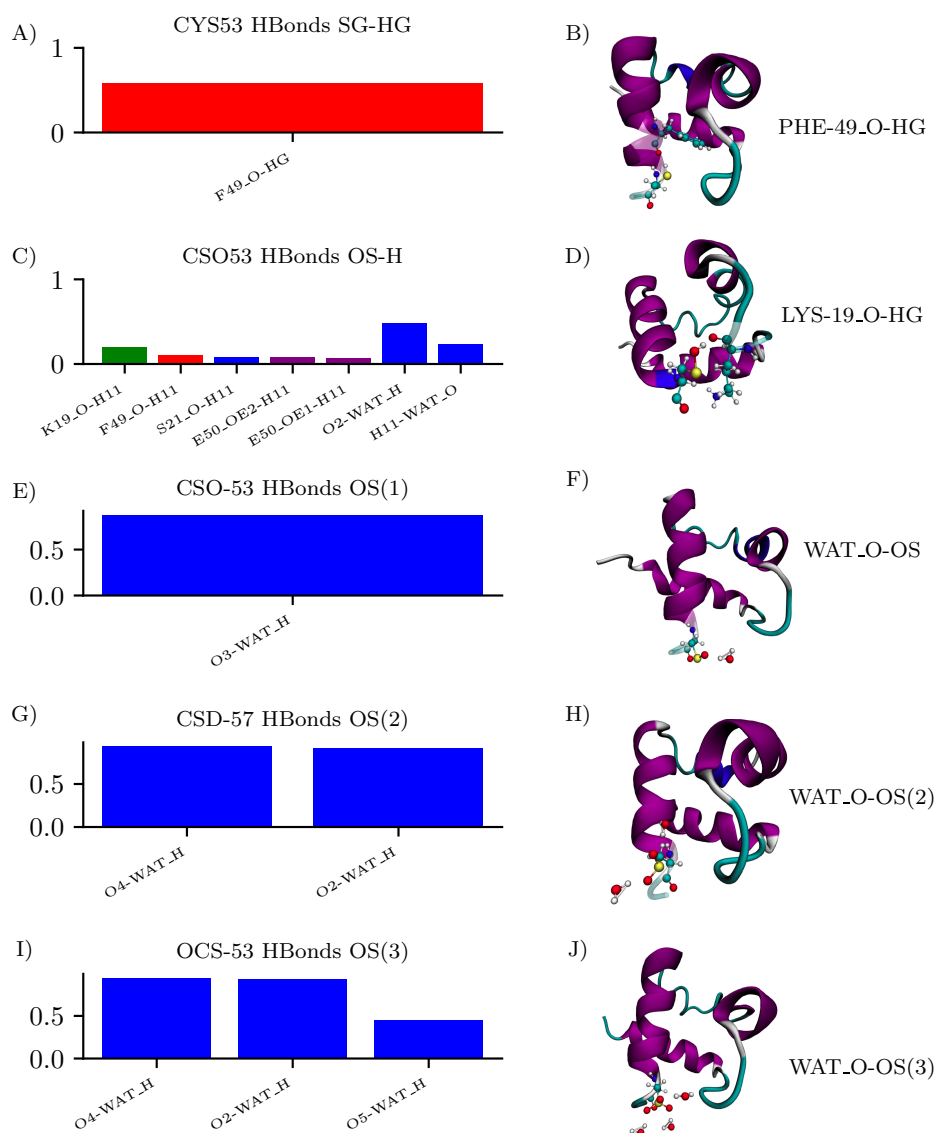

Figure S6: Hydrogen bond analysis of the side chain of the oxidized residue (position 53) in URN1-FF protein. The analysis was conducted using *pytraj*'s searchhbond function. The bar plots indicate the fraction of frames, the respective interaction was observed. The right side shows illustrations of the respective interactions. Interactions observed in less than 5% of frames are not shown. Note that the numbering of the residues is shifted here by -4. This is due to the first four residues not having been resolved in the crystal structure.

## 1.4 DJ-1 Homodimer system

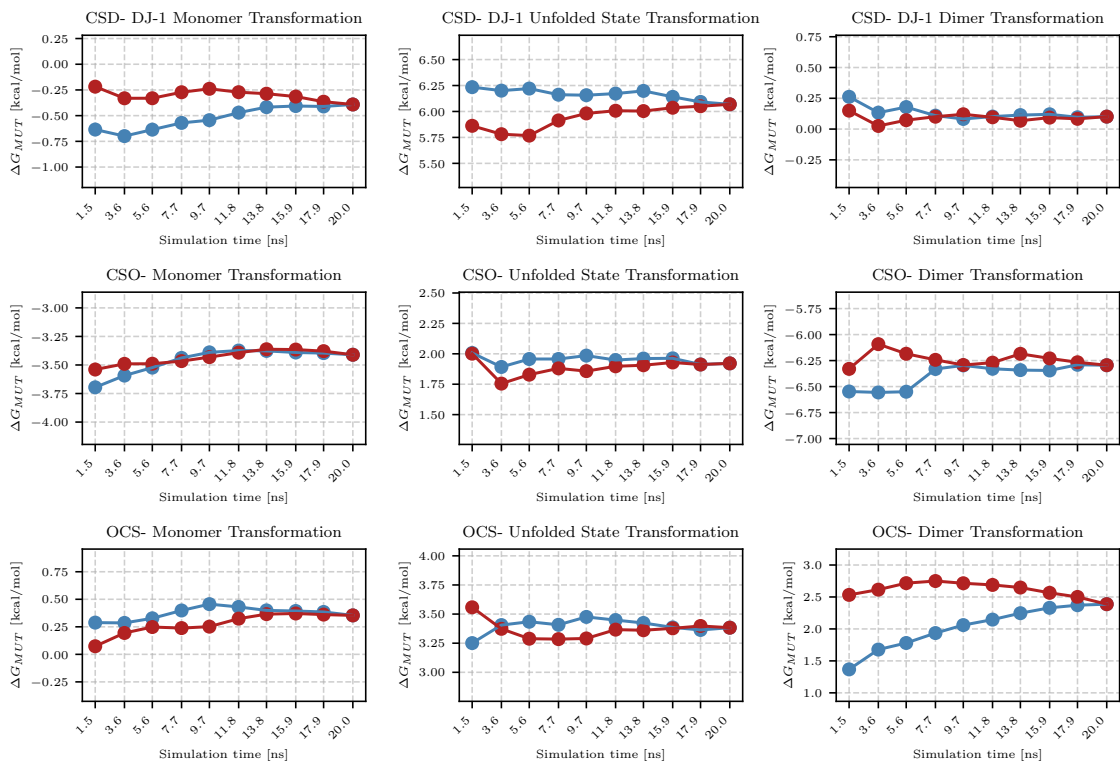

Figure S7: Convergence of the alchemical transformations studied by considering alchemical forward (blue dots) and backward (red dots) transformations for the DJ-1 dimer system vs. simulation time per lambda window (taking consecutively more data into account) following the method by A. Mey et Al. [36]. Close final proximity of both curves indicates convergence.

### RMSF analysis of DJ-1 dimer upon oxidation

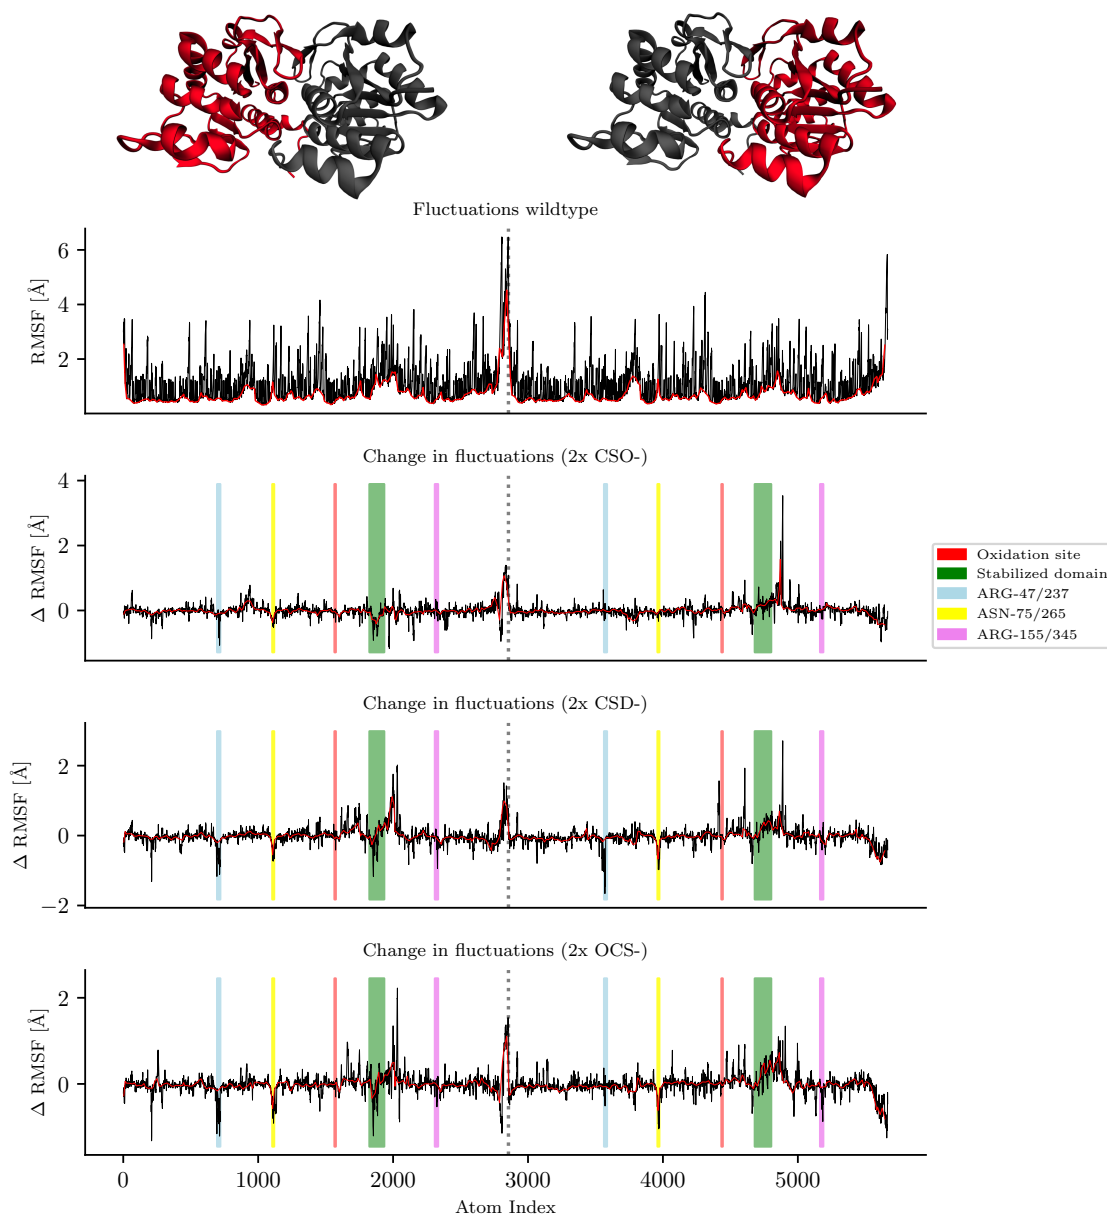

Figure S8:  $\Delta$ Root Mean Square Fluctuation (RMSF) analysis of the DJ-1 dimer (all atom RMSF). The graphs for the oxidized states show the respective difference in the RMSF for all atoms with backbone CA atoms marked as red dots. The results belonging to different monomers are separated by a dotted line, with the illustrations indicating the respective protein. For general assessment, the wild type's absolute fluctuations are shown first. To highlight the effects of the oxidations, the respective graphs show the changes in RMSF. Important regions are marked in the graphs.

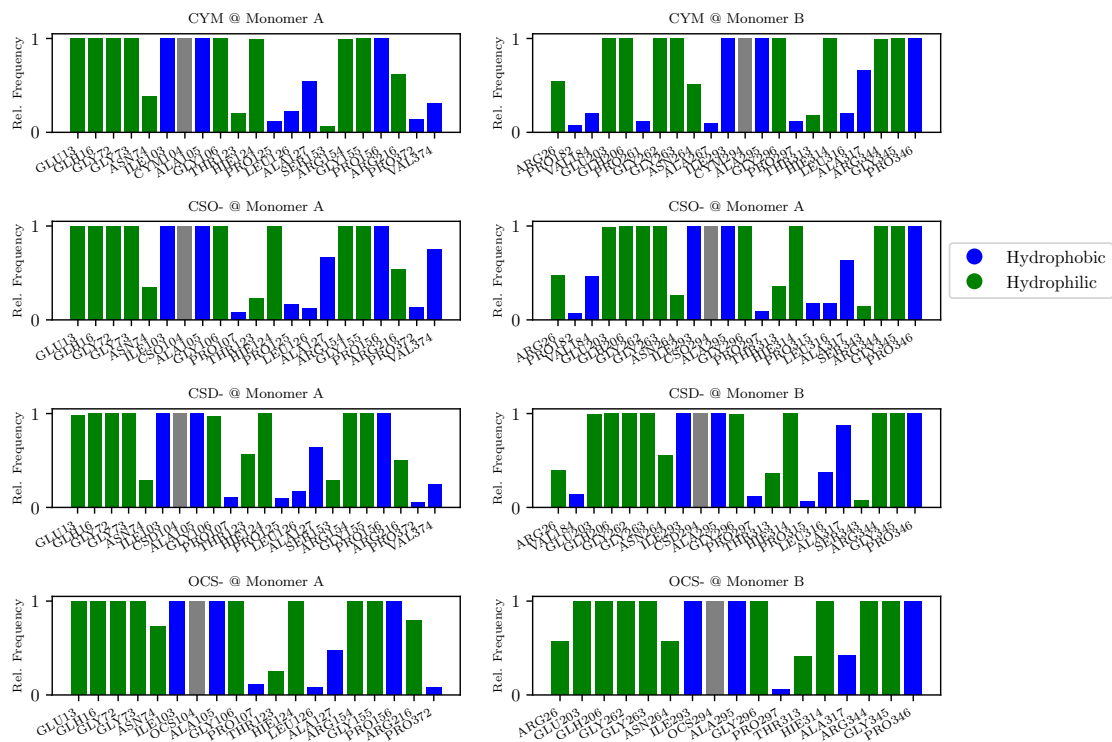

Figure S9: Neighbouring residues of the residue 106 (oxidation site) in DJ-1 protein. On the left, the results for the first monomer are presented and on the right for the second monomer. Interactions observed in less than 5% of the frames are not shown. Analysis conducted using *pytraj*'s searchneighbours function [40]. Note that the numbering of the residues is shifted here by -2. This is due to the first four residues not having been resolved in the crystal structure.

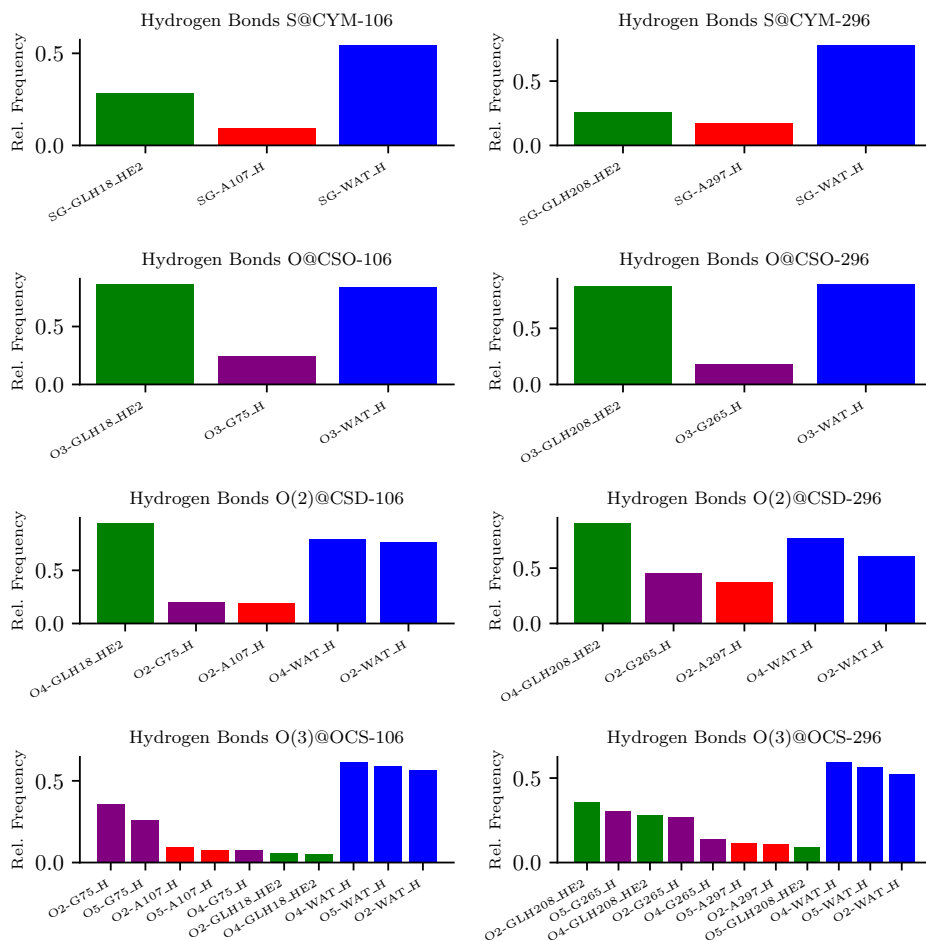

Figure S10: Hydrogen bond analysis of CYS-106 and CYS-296 for all three oxidation states. Hydrogen bonds were detected using *pytraj*'s searchhbonds function. Note that the detection algorithm is based on a cutoff distance and angle between the donor and acceptor atom. Due to this it can happen that more than one hydrogen bond exists in one frame. In consequence, the frequencies shown should be treated more as a general measure. Note that the numbering of the residues is shifted here by -2. This is due to the first four residues not having been resolved in the crystal structure.

## 1.5 Force field parameters

CSO.prepin

0 0 2

Cysteine sulfenic acid (protonated/neutral) by T.Mauck and M.Zacharias

molecule.res

CSO INT 0

CORRECT

OMIT DU BEG

0.0000

|    |      |    |   |    |    |    |       |         |          |           |
|----|------|----|---|----|----|----|-------|---------|----------|-----------|
| 1  | DUMM | DU | M | 0  | -1 | -2 | 0.000 | .0      | .0       | .00000    |
| 2  | DUMM | DU | M | 1  | 0  | -1 | 1.449 | .0      | .0       | .00000    |
| 3  | DUMM | DU | M | 2  | 1  | 0  | 1.523 | 111.21  | .0       | .00000    |
| 4  | N    | N  | M | 3  | 2  | 1  | 1.540 | 111.208 | -180.000 | -0.415700 |
| 5  | H    | H  | E | 4  | 3  | 2  | 1.015 | 139.534 | 65.031   | 0.271900  |
| 6  | CA   | CT | M | 4  | 3  | 2  | 1.460 | 95.148  | -74.769  | 0.079652  |
| 7  | CB   | CT | 3 | 6  | 4  | 3  | 1.538 | 111.215 | 163.166  | -0.045783 |
| 8  | S    | S  | S | 7  | 6  | 4  | 1.826 | 115.027 | -56.813  | -0.037190 |
| 9  | OS   | OH | S | 8  | 7  | 6  | 1.694 | 101.408 | -53.406  | -0.475221 |
| 10 | HOS  | HO | E | 9  | 8  | 7  | 0.973 | 106.884 | -88.482  | 0.387275  |
| 11 | HB1  | H1 | E | 7  | 6  | 4  | 1.092 | 108.009 | 178.602  | 0.076982  |
| 12 | HB2  | H1 | E | 7  | 6  | 4  | 1.099 | 110.964 | 60.630   | 0.076982  |
| 13 | HA   | H1 | E | 6  | 4  | 3  | 1.095 | 109.369 | 43.052   | 0.051803  |
| 14 | C    | C  | M | 6  | 4  | 3  | 1.544 | 114.924 | -75.109  | 0.597200  |
| 15 | O    | O  | E | 14 | 6  | 4  | 1.227 | 119.192 | 170.912  | -0.567900 |

LOOP

IMPROPER

|    |    |   |   |
|----|----|---|---|
| -M | CA | N | H |
| CA | +M | C | O |

DONE

STOP

frmod1.CSO

AMBER-Parameters for Cysteine sulfenic acid (protonated) by T.Mauck and M.Zacharias  
MASS

|    |        |       |
|----|--------|-------|
| N  | 14.010 | 0.530 |
| H  | 1.008  | 0.161 |
| CT | 12.010 | 0.878 |
| S  | 32.060 | 2.900 |
| OH | 16.000 | 0.465 |
| HO | 1.008  | 0.135 |
| H1 | 1.008  | 0.135 |
| C  | 12.010 | 0.616 |
| O  | 16.000 | 0.434 |

BOND

|       |        |       |
|-------|--------|-------|
| H -N  | 403.20 | 1.013 |
| CT-N  | 328.70 | 1.462 |
| CT-CT | 300.90 | 1.538 |
| CT-H1 | 330.60 | 1.097 |
| C -CT | 313.00 | 1.524 |
| CT-S  | 215.90 | 1.839 |
| OH-S  | 261.40 | 1.688 |
| HO-OH | 371.40 | 0.973 |
| C -O  | 637.70 | 1.218 |

ANGLE

|          |        |         |
|----------|--------|---------|
| CT-CT-N  | 65.900 | 111.610 |
| H1-CT-N  | 49.800 | 108.880 |
| C -CT-N  | 67.000 | 109.060 |
| CT-N -H  | 45.800 | 117.680 |
| CT-CT-S  | 61.300 | 110.270 |
| CT-CT-H1 | 46.400 | 109.560 |
| CT-C -O  | 67.400 | 123.200 |
| C -CT-CT | 63.300 | 111.040 |
| CT-S -OH | 64.800 | 98.280  |
| H1-CT-S  | 42.100 | 108.760 |
| HO-OH-S  | 42.900 | 107.110 |
| H1-CT-H1 | 39.200 | 108.460 |
| C -CT-H1 | 47.000 | 108.220 |

DIHE

|             |   |       |         |        |
|-------------|---|-------|---------|--------|
| N -CT-CT-S  | 9 | 1.400 | 0.000   | 3.000  |
| H1-CT-CT-N  | 9 | 1.400 | 0.000   | 3.000  |
| O -C -CT-N  | 6 | 0.000 | 180.000 | 2.000  |
| CT-CT-N -H  | 6 | 0.000 | 0.000   | 2.000  |
| H1-CT-N -H  | 6 | 0.000 | 0.000   | 2.000  |
| C -CT-N -H  | 6 | 0.000 | 0.000   | 2.000  |
| CT-CT-S -OH | 3 | 1.000 | 0.000   | 3.000  |
| O -C -CT-CT | 6 | 0.000 | 180.000 | 2.000  |
| HO-OH-S -CT | 1 | 2.400 | 0.000   | 2.000  |
| H1-CT-S -OH | 3 | 1.000 | 0.000   | 3.000  |
| H1-CT-CT-S  | 9 | 1.400 | 0.000   | 3.000  |
| H1-CT-CT-H1 | 9 | 1.400 | 0.000   | 3.000  |
| O -C -CT-H1 | 1 | 0.800 | 0.000   | -1.000 |
| O -C -CT-H1 | 1 | 0.000 | 0.000   | -2.000 |
| O -C -CT-H1 | 1 | 0.080 | 180.000 | 3.000  |
| C -CT-CT-S  | 9 | 1.400 | 0.000   | 3.000  |
| C -CT-CT-H1 | 9 | 1.400 | 0.000   | 3.000  |

IMPROPER

NONBON

|    |        |        |
|----|--------|--------|
| N  | 1.8240 | 0.1700 |
| H  | 0.6000 | 0.0157 |
| CT | 1.9080 | 0.1094 |

|    |        |        |
|----|--------|--------|
| S  | 2.0000 | 0.2500 |
| OH | 1.7210 | 0.2104 |
| HO | 0.0000 | 0.0000 |
| H1 | 1.3870 | 0.0157 |
| C  | 1.9080 | 0.0860 |
| O  | 1.6612 | 0.2100 |

frcmod2.CSO

GAFF-Parameters for Cysteine sulfenic acid (protonated) by T.Mauck and M.Zacharias

MASS

|    |        |       |
|----|--------|-------|
| N  | 14.010 | 0.530 |
| H  | 1.008  | 0.161 |
| CT | 12.010 | 0.878 |
| S  | 32.060 | 2.900 |
| OH | 16.000 | 0.465 |
| HO | 1.008  | 0.135 |
| H1 | 1.008  | 0.135 |
| C  | 12.010 | 0.616 |
| O  | 16.000 | 0.434 |

BOND

|       |        |       |
|-------|--------|-------|
| H -N  | 403.20 | 1.013 |
| CT-N  | 328.70 | 1.462 |
| CT-CT | 300.90 | 1.538 |
| CT-H1 | 330.60 | 1.097 |
| C -CT | 313.00 | 1.524 |
| CT-S  | 215.90 | 1.839 |
| OH-S  | 261.40 | 1.688 |
| HO-OH | 371.40 | 0.973 |
| C -O  | 637.70 | 1.218 |

ANGLE

|          |        |         |
|----------|--------|---------|
| CT-CT-N  | 65.900 | 111.610 |
| H1-CT-N  | 49.800 | 108.880 |
| C -CT-N  | 67.000 | 109.060 |
| CT-N -H  | 45.800 | 117.680 |
| CT-CT-S  | 61.300 | 110.270 |
| CT-CT-H1 | 46.400 | 109.560 |
| CT-C -O  | 67.400 | 123.200 |
| C -CT-CT | 63.300 | 111.040 |
| CT-S -OH | 64.800 | 98.280  |
| H1-CT-S  | 42.100 | 108.760 |
| HO-OH-S  | 42.900 | 107.110 |
| H1-CT-H1 | 39.200 | 108.460 |
| C -CT-H1 | 47.000 | 108.220 |

DIHE

|             |   |       |         |        |
|-------------|---|-------|---------|--------|
| N -CT-CT-S  | 9 | 1.400 | 0.000   | 3.000  |
| H1-CT-CT-N  | 9 | 1.400 | 0.000   | 3.000  |
| O -C -CT-N  | 6 | 0.000 | 180.000 | 2.000  |
| CT-CT-N -H  | 6 | 0.000 | 0.000   | 2.000  |
| H1-CT-N -H  | 6 | 0.000 | 0.000   | 2.000  |
| C -CT-N -H  | 6 | 0.000 | 0.000   | 2.000  |
| CT-CT-S -OH | 3 | 1.000 | 0.000   | 3.000  |
| O -C -CT-CT | 6 | 0.000 | 180.000 | 2.000  |
| HO-OH-S -CT | 1 | 2.400 | 0.000   | 2.000  |
| H1-CT-S -OH | 3 | 1.000 | 0.000   | 3.000  |
| H1-CT-CT-S  | 9 | 1.400 | 0.000   | 3.000  |
| H1-CT-CT-H1 | 9 | 1.400 | 0.000   | 3.000  |
| O -C -CT-H1 | 1 | 0.800 | 0.000   | -1.000 |
| O -C -CT-H1 | 1 | 0.000 | 0.000   | -2.000 |
| O -C -CT-H1 | 1 | 0.080 | 180.000 | 3.000  |
| C -CT-CT-S  | 9 | 1.400 | 0.000   | 3.000  |
| C -CT-CT-H1 | 9 | 1.400 | 0.000   | 3.000  |

IMPROPER

NONBON

|    |        |        |            |
|----|--------|--------|------------|
| N  | 1.8240 | 0.1700 | same as n  |
| H  | 0.6000 | 0.0157 | same as hn |
| CT | 1.9080 | 0.1094 | same as c3 |
| S  | 2.0000 | 0.2500 | same as ss |
| OH | 1.7210 | 0.2104 | same as oh |
| HO | 0.0000 | 0.0000 | same as ho |
| H1 | 1.3870 | 0.0157 | same as h1 |

C 1.9080 0.0860 same as c  
 O 1.6612 0.2100 same as o

CSO-.prepin

0 0 2

Cysteine sulfinic acid (deprotonated) by T.Mauck and M.Zacharias  
 molecule.res

CSO INT 0  
 CORRECT OMIT DU BEG  
 0.0000  
 1 DUMM DU M 0 -1 -2 0.000 .0 .0 .00000  
 2 DUMM DU M 1 0 -1 1.449 .0 .0 .00000  
 3 DUMM DU M 2 1 0 1.523 111.21 .0 .00000  
 4 N N M 3 2 1 1.540 111.208 -180.000 -0.516300  
 5 H H E 4 3 2 1.038 28.870 88.514 0.293600  
 6 CA CT M 4 3 2 1.463 96.239 -28.997 -0.068617  
 7 CB CT 3 6 4 3 1.558 107.453 49.225 -0.130546  
 8 SG S S 7 6 4 1.852 112.184 -51.215 -0.258717  
 9 OS O E 8 7 6 1.586 106.405 -62.597 -0.585888  
 10 HB1 H1 E 7 6 4 1.096 107.614 -173.284 0.098871  
 11 HB2 H1 E 7 6 4 1.100 109.982 68.141 0.098871  
 12 HA H1 E 6 4 3 1.096 110.381 -67.522 0.114025  
 13 C C M 6 4 3 1.524 113.797 171.289 0.536600  
 14 O O E 13 6 4 1.228 122.085 159.176 -0.581900

LOOP

IMPROPER

-M CA N H  
 CA +M C O

DONE

STOP

frmod1.CSO-

AMBER14-Parameters for Cysteine sulfenic acid (deprotonated) by T.Mauck and M.Zacharias  
 MASS

N 14.010 0.530  
 H 1.008 0.161  
 CT 12.010 0.878  
 S 32.060 2.900  
 O 16.000 0.434  
 H1 1.008 0.135  
 C 12.010 0.616

BOND

H -N 434.00 1.010  
 CT-N 337.00 1.449  
 CT-CT 310.00 1.526  
 CT-H1 340.00 1.090  
 C -CT 317.00 1.522  
 CT-S 227.00 1.810  
 C -O 570.00 1.229

ANGLE

CT-CT-N 80.000 109.700  
 H1-CT-N 50.000 109.500  
 C -CT-N 63.000 110.100  
 CT-N -H 50.000 118.040  
 CT-CT-S 50.000 114.700  
 CT-CT-H1 50.000 109.500  
 CT-C -O 80.000 120.400  
 C -CT-CT 63.000 111.100  
 H1-CT-S 50.000 109.500  
 H1-CT-H1 35.000 109.500  
 C -CT-H1 50.000 109.500

DIHE

N -CT-CT-S 9 1.400 0.000 3.000  
 H1-CT-CT-N 9 1.400 0.000 3.000  
 O -C -CT-N 6 0.000 0.000 2.000  
 CT-CT-N -H 6 0.000 0.000 2.000  
 H1-CT-N -H 6 0.000 0.000 2.000

|             |   |       |         |        |
|-------------|---|-------|---------|--------|
| C -CT-N -H  | 6 | 0.000 | 0.000   | 2.000  |
| CT-CT-S -O  | 3 | 1.000 | 0.000   | 3.000  |
| O -C -CT-CT | 6 | 0.000 | 0.000   | 2.000  |
| H1-CT-S -O  | 3 | 1.000 | 0.000   | 3.000  |
| H1-CT-CT-S  | 9 | 1.400 | 0.000   | 3.000  |
| H1-CT-CT-H1 | 9 | 1.400 | 0.000   | 3.000  |
| O -C -CT-H1 | 1 | 0.800 | 0.000   | -1.000 |
| O -C -CT-H1 | 1 | 0.000 | 0.000   | -2.000 |
| O -C -CT-H1 | 1 | 0.080 | 180.000 | 3.000  |
| C -CT-CT-S  | 9 | 1.400 | 0.000   | 3.000  |
| C -CT-CT-H1 | 9 | 1.400 | 0.000   | 3.000  |

IMPROPER

NONBON

|    |        |        |
|----|--------|--------|
| N  | 1.8240 | 0.1700 |
| H  | 0.6000 | 0.0157 |
| CT | 1.9080 | 0.1094 |
| S  | 2.0000 | 0.2500 |
| O  | 1.6612 | 0.2100 |
| H1 | 1.3870 | 0.0157 |
| C  | 1.9080 | 0.0860 |

frcmod2.CSO-

GAFF-Parameters for Cysteine sulfenic acid (deprotonated) by T.Mauck and M.Zacharias  
MASS

|    |        |       |
|----|--------|-------|
| N  | 14.010 | 0.530 |
| H  | 1.008  | 0.161 |
| CT | 12.010 | 0.878 |
| S  | 32.060 | 2.900 |
| O  | 16.000 | 0.434 |
| H1 | 1.008  | 0.135 |
| C  | 12.010 | 0.616 |

BOND

|       |        |       |
|-------|--------|-------|
| H -N  | 403.20 | 1.013 |
| CT-N  | 328.70 | 1.462 |
| CT-CT | 300.90 | 1.538 |
| CT-H1 | 330.60 | 1.097 |
| C -CT | 313.00 | 1.524 |
| CT-S  | 215.90 | 1.839 |
| O -S  | 435.70 | 1.507 |
| C -O  | 637.70 | 1.218 |

ANGLE

|          |        |         |
|----------|--------|---------|
| CT-CT-N  | 65.900 | 111.610 |
| H1-CT-N  | 49.800 | 108.880 |
| C -CT-N  | 67.000 | 109.060 |
| CT-N -H  | 45.800 | 117.680 |
| CT-CT-S  | 61.300 | 110.270 |
| CT-CT-H1 | 46.400 | 109.560 |
| CT-C -O  | 67.400 | 123.200 |
| C -CT-CT | 63.300 | 111.040 |
| CT-S -O  | 64.400 | 106.990 |
| H1-CT-S  | 42.100 | 108.760 |
| H1-CT-H1 | 39.200 | 108.460 |
| C -CT-H1 | 47.000 | 108.220 |

DIHE

|             |   |       |         |        |
|-------------|---|-------|---------|--------|
| N -CT-CT-S  | 9 | 1.400 | 0.000   | 3.000  |
| H1-CT-CT-N  | 9 | 1.400 | 0.000   | 3.000  |
| O -C -CT-N  | 6 | 0.000 | 180.000 | 2.000  |
| CT-CT-N -H  | 6 | 0.000 | 0.000   | 2.000  |
| H1-CT-N -H  | 6 | 0.000 | 0.000   | 2.000  |
| C -CT-N -H  | 6 | 0.000 | 0.000   | 2.000  |
| CT-CT-S -O  | 3 | 1.000 | 0.000   | 3.000  |
| O -C -CT-CT | 6 | 0.000 | 180.000 | 2.000  |
| H1-CT-S -O  | 3 | 1.000 | 0.000   | 3.000  |
| H1-CT-CT-S  | 9 | 1.400 | 0.000   | 3.000  |
| H1-CT-CT-H1 | 9 | 1.400 | 0.000   | 3.000  |
| O -C -CT-H1 | 1 | 0.800 | 0.000   | -1.000 |
| O -C -CT-H1 | 1 | 0.000 | 0.000   | -2.000 |
| O -C -CT-H1 | 1 | 0.080 | 180.000 | 3.000  |
| C -CT-CT-S  | 9 | 1.400 | 0.000   | 3.000  |
| C -CT-CT-H1 | 9 | 1.400 | 0.000   | 3.000  |



|      |       |        |     |        |         |         |        |
|------|-------|--------|-----|--------|---------|---------|--------|
| c3-c | -N    | -H     | 4   | 10.000 | 180.000 | 2.000   |        |
| c3-c | -N    | -CX    | 4   | 10.000 | 180.000 | 2.000   |        |
| o    | -c    | -N     | -H  | 1      | 2.500   | 180.000 | -2.000 |
| o    | -c    | -N     | -H  | 1      | 2.000   | 0.000   | 1.000  |
| CX-C | -n    | -hn    | 4   | 10.000 | 180.000 | 2.000   |        |
| CX-C | -n    | -c3    | 4   | 10.000 | 180.000 | 2.000   |        |
| C    | -n    | -c3-c3 | 1   | 0.000  | 0.000   | -4.000  |        |
| C    | -n    | -c3-c3 | 1   | 0.400  | 0.000   | -3.000  |        |
| C    | -n    | -c3-c3 | 1   | 2.000  | 0.000   | -2.000  |        |
| C    | -n    | -c3-c3 | 1   | 2.000  | 0.000   | 1.000   |        |
| C    | -n    | -c3-h1 | 6   | 0.000  | 0.000   | 2.000   |        |
| c    | -c3-n | -C     | 6   | 0.000  | 0.000   | 2.000   |        |
| O    | -C    | -n     | -hn | 1      | 2.000   | 0.000   | 1.000  |
| O    | -C    | -n     | -hn | 1      | 2.500   | 180.000 | -2.000 |
| o    | -C    | -n     | -c3 | 4      | 10.000  | 180.000 | 2.000  |
| o    | -c    | -N     | -CX | 4      | 10.000  | 180.000 | 2.000  |
| O    | -C    | -n     | -c3 | 4      | 10.000  | 180.000 | 2.000  |

IMPROPER

|   |       |     |     |       |       |     |
|---|-------|-----|-----|-------|-------|-----|
| c | -c3-n | -hn | 1.1 | 180.0 | 2.0   |     |
| o | -c    | -N  | -CX | 10.5  | 180.0 | 2.0 |

NONBON

|    |        |        |           |
|----|--------|--------|-----------|
| ns | 1.8240 | 0.1700 | same as n |
|----|--------|--------|-----------|

OCS-.prepin

0 0 2

Cysteine sulfonic acid (deprotonated) by T.Mauck and M.Zacharias

molecule.res

OCS INT 0

CORRECT OMIT DU BEG

0.0000

|    |      |    |   |    |    |    |       |         |          |           |
|----|------|----|---|----|----|----|-------|---------|----------|-----------|
| 1  | DUMM | DU | M | 0  | -1 | -2 | 0.000 | .0      | .0       | .00000    |
| 2  | DUMM | DU | M | 1  | 0  | -1 | 1.449 | .0      | .0       | .00000    |
| 3  | DUMM | DU | M | 2  | 1  | 0  | 1.523 | 111.21  | .0       | .00000    |
| 4  | N    | N  | M | 3  | 2  | 1  | 1.540 | 111.208 | -180.000 | -0.516300 |
| 5  | H    | H  | E | 4  | 3  | 2  | 1.036 | 32.297  | 130.826  | 0.293600  |
| 6  | CA   | CT | M | 4  | 3  | 2  | 1.465 | 82.902  | -30.376  | 0.047695  |
| 7  | CB   | CT | 3 | 6  | 4  | 3  | 1.539 | 109.776 | -4.451   | -0.055004 |
| 8  | SG   | SO | 3 | 7  | 6  | 4  | 1.845 | 116.054 | 43.514   | 1.061279  |
| 9  | OS1  | O  | E | 8  | 7  | 6  | 1.513 | 102.853 | -62.056  | -0.650854 |
| 10 | OS2  | O  | E | 8  | 7  | 6  | 1.482 | 106.066 | 56.899   | -0.650854 |
| 11 | OS3  | O  | E | 8  | 7  | 6  | 1.482 | 103.652 | 179.857  | -0.650854 |
| 12 | HB1  | H1 | E | 7  | 6  | 4  | 1.091 | 108.491 | 163.727  | 0.051984  |
| 13 | HB2  | H1 | E | 7  | 6  | 4  | 1.093 | 110.313 | -76.184  | 0.051984  |
| 14 | HA   | H1 | E | 6  | 4  | 3  | 1.101 | 107.141 | -121.533 | 0.062624  |
| 15 | C    | C  | M | 6  | 4  | 3  | 1.554 | 116.220 | 123.216  | 0.536600  |
| 16 | O    | O  | E | 15 | 6  | 4  | 1.227 | 121.632 | -152.218 | -0.581900 |

LOOP

IMPROPER

|    |    |   |   |
|----|----|---|---|
| -M | CA | N | H |
| CA | +M | C | O |

DONE

STOP

frmod1.OCS-

AMBER-Parameters for Cysteine sulfonic acid (deprotonated) by T.Mauck and M.Zacharias

MASS

|    |        |       |
|----|--------|-------|
| N  | 14.010 | 0.530 |
| H  | 1.008  | 0.161 |
| CT | 12.010 | 0.878 |
| O  | 16.000 | 0.434 |
| H1 | 1.008  | 0.135 |
| C  | 12.010 | 0.616 |

BOND

|    |     |        |       |
|----|-----|--------|-------|
| H  | -N  | 434.00 | 1.010 |
| CT | -N  | 337.00 | 1.449 |
| CT | -CT | 310.00 | 1.526 |
| CT | -H1 | 340.00 | 1.090 |

|       |        |       |
|-------|--------|-------|
| C -CT | 317.00 | 1.522 |
| C -O  | 570.00 | 1.229 |

ANGLE

|          |        |         |
|----------|--------|---------|
| CT-CT-N  | 80.000 | 109.700 |
| H1-CT-N  | 50.000 | 109.500 |
| C -CT-N  | 63.000 | 110.100 |
| CT-N -H  | 50.000 | 118.040 |
| CT-CT-H1 | 50.000 | 109.500 |
| CT-C -O  | 80.000 | 120.400 |
| C -CT-CT | 63.000 | 111.100 |
| H1-CT-H1 | 35.000 | 109.500 |
| C -CT-H1 | 50.000 | 109.500 |

DIHE

|             |   |       |         |        |
|-------------|---|-------|---------|--------|
| N -CT-CT-SO | 9 | 1.400 | 0.000   | 3.000  |
| H1-CT-CT-N  | 9 | 1.400 | 0.000   | 3.000  |
| O -C -CT-N  | 6 | 0.000 | 0.000   | 2.000  |
| CT-CT-N -H  | 6 | 0.000 | 0.000   | 2.000  |
| H1-CT-N -H  | 6 | 0.000 | 0.000   | 2.000  |
| C -CT-N -H  | 6 | 0.000 | 0.000   | 2.000  |
| CT-CT-SO-O  | 0 | 0.000 | 0.000   | 0.000  |
| O -C -CT-CT | 6 | 0.000 | 0.000   | 2.000  |
| H1-CT-SO-O  | 0 | 0.000 | 0.000   | 0.000  |
| H1-CT-CT-SO | 9 | 1.400 | 0.000   | 3.000  |
| H1-CT-CT-H1 | 9 | 1.400 | 0.000   | 3.000  |
| O -C -CT-H1 | 1 | 0.800 | 0.000   | -1.000 |
| O -C -CT-H1 | 1 | 0.000 | 0.000   | -2.000 |
| O -C -CT-H1 | 1 | 0.080 | 180.000 | 3.000  |
| C -CT-CT-SO | 9 | 1.400 | 0.000   | 3.000  |
| C -CT-CT-H1 | 9 | 1.400 | 0.000   | 3.000  |

IMPROPER

NONBON

|    |        |        |
|----|--------|--------|
| N  | 1.8240 | 0.1700 |
| H  | 0.6000 | 0.0157 |
| CT | 1.9080 | 0.1094 |
| O  | 1.6612 | 0.2100 |
| H1 | 1.3870 | 0.0157 |
| C  | 1.9080 | 0.0860 |

frcmod2.OCS-

GAFF-Parameters for Cysteine sulfonic acid (deprotonated) by T.Mauck and M.Zacharias  
MASS

|    |        |       |
|----|--------|-------|
| N  | 14.010 | 0.530 |
| H  | 1.008  | 0.161 |
| CT | 12.010 | 0.878 |
| SO | 32.060 | 2.900 |
| O  | 16.000 | 0.434 |
| H1 | 1.008  | 0.135 |
| C  | 12.010 | 0.616 |

BOND

|       |        |       |
|-------|--------|-------|
| H -N  | 403.20 | 1.013 |
| CT-N  | 328.70 | 1.462 |
| CT-CT | 300.90 | 1.538 |
| CT-H1 | 330.60 | 1.097 |
| C -CT | 313.00 | 1.524 |
| CT-SO | 233.50 | 1.808 |
| O -SO | 512.70 | 1.453 |
| C -O  | 637.70 | 1.218 |

ANGLE

|          |        |         |
|----------|--------|---------|
| CT-CT-N  | 65.900 | 111.610 |
| H1-CT-N  | 49.800 | 108.880 |
| C -CT-N  | 67.000 | 109.060 |
| CT-N -H  | 45.800 | 117.680 |
| CT-CT-SO | 62.100 | 110.220 |
| CT-CT-H1 | 46.400 | 109.560 |
| CT-C -O  | 67.400 | 123.200 |
| C -CT-CT | 63.300 | 111.040 |
| CT-SO-O  | 65.400 | 108.610 |
| H1-CT-SO | 43.200 | 107.150 |
| O -SO-O  | 73.600 | 120.050 |

|          |        |         |
|----------|--------|---------|
| H1-CT-H1 | 39.200 | 108.460 |
| C -CT-H1 | 47.000 | 108.220 |

DIHE

|             |   |       |         |        |
|-------------|---|-------|---------|--------|
| N -CT-CT-SO | 9 | 1.400 | 0.000   | 3.000  |
| H1-CT-CT-N  | 9 | 1.400 | 0.000   | 3.000  |
| O -C -CT-N  | 6 | 0.000 | 180.000 | 2.000  |
| CT-CT-N -H  | 6 | 0.000 | 0.000   | 2.000  |
| H1-CT-N -H  | 6 | 0.000 | 0.000   | 2.000  |
| C -CT-N -H  | 6 | 0.000 | 0.000   | 2.000  |
| CT-CT-SO-O  | 9 | 1.300 | 0.000   | 3.000  |
| O -C -CT-CT | 6 | 0.000 | 180.000 | 2.000  |
| H1-CT-SO-O  | 9 | 1.300 | 0.000   | 3.000  |
| H1-CT-CT-SO | 9 | 1.400 | 0.000   | 3.000  |
| H1-CT-CT-H1 | 9 | 1.400 | 0.000   | 3.000  |
| O -C -CT-H1 | 1 | 0.800 | 0.000   | -1.000 |
| O -C -CT-H1 | 1 | 0.000 | 0.000   | -2.000 |
| O -C -CT-H1 | 1 | 0.080 | 180.000 | 3.000  |
| C -CT-CT-SO | 9 | 1.400 | 0.000   | 3.000  |
| C -CT-CT-H1 | 9 | 1.400 | 0.000   | 3.000  |

IMPROPER

NONBON

|    |        |        |            |
|----|--------|--------|------------|
| N  | 1.8240 | 0.1700 | same as n  |
| H  | 0.6000 | 0.0157 | same as hn |
| CT | 1.9080 | 0.1094 | same as c3 |
| SO | 2.0000 | 0.2500 | same as s6 |
| O  | 1.6612 | 0.2100 | same as o  |
| H1 | 1.3870 | 0.0157 | same as h1 |
| C  | 1.9080 | 0.0860 | same as c  |
